# Supplementary material for: Clinical development and management of adverse events associated with FGFR inhibitors
Source: PubMed Central journal article supplement — Cell Rep Med. 2023 Sep 26;4(10):101204. doi: 10.1016/j.xcrm.2023.101204 (PMC10591034; doi:10.1016/j.xcrm.2023.101204), 2023-09-26

**Cell Reports Medicine, Volume 4**

**Supplemental information**

**Clinical development and management  
of adverse events associated with FGFR inhibitors**

**Vivek Subbiah and Srdan Verstovsek**

**Supplementary Table 1. Overview of FGFR inhibitors**

|                                                                                                                                                                                                                                                                                                                                                 | <b>CR/PR/SD/PD, %</b> | <b>Median PFS, (95% CI), mo</b> | <b>Median OS, (95% CI), mo</b> |
|-------------------------------------------------------------------------------------------------------------------------------------------------------------------------------------------------------------------------------------------------------------------------------------------------------------------------------------------------|-----------------------|---------------------------------|--------------------------------|
| <b>Erdafitinib</b> , approved in the United States for metastatic or locally advanced urothelial cancer with <i>FGFR2</i> or <i>FGFR3</i> alteration, that has progressed on platinum-based chemotherapy(Janssen Oncology, 2022)<br>IC <sub>50</sub> for FGFR1, 2, 3, and 4 = 1.2, 2.5, 3.0, and 5.7 nM(Perera et al., 2017)                    |                       |                                 |                                |
| <b>Phase I</b>                                                                                                                                                                                                                                                                                                                                  |                       |                                 |                                |
| <i>CR100845</i><br>Open-label, multicenter, phase I, dose-escalation and confirmation study in patients with advanced or refractory solid tumors (NCT01703481)(Tabernero et al., 2015)<br>( <i>N</i> = 65; data shown are for patients with <i>FGF/FGFR</i> alterations [ <i>n</i> = 23])                                                       | 0/22/70/9             | NR                              | NR                             |
| <b>Phase II</b>                                                                                                                                                                                                                                                                                                                                 |                       |                                 |                                |
| <i>BLC2001</i><br>Open-label, multicenter, phase II study in patients with locally advanced and unresectable or metastatic urothelial carcinoma with <i>FGFR</i> alterations (NCT02365597)(Loriot et al., 2019)<br>( <i>N</i> = 99)                                                                                                             | 3/37/39/18            | 5.5 (4.2-6.0)                   | 13.8 (9.8-NR)                  |
| <b>Phase III</b>                                                                                                                                                                                                                                                                                                                                |                       |                                 |                                |
| <i>CR108401</i><br>Open-label, randomized, multicenter study comparing erdafitinib with vinflunine or docetaxel, or pembrolizumab in patients with advanced urothelial carcinoma with selected <i>FGFR</i> aberrations (NCT03390504)(ClinicalTrials.gov, 2022)<br>( <i>N</i> = 631 – estimated)                                                 | <i>Trial ongoing</i>  | <i>Trial ongoing</i>            | <i>Trial ongoing</i>           |
| <b>Pemigatinib</b> , approved in the United States, Europe, Japan, China, and Canada for adults with previously treated, unresectable locally advanced or metastatic CCA with an <i>FGFR2</i> fusion or other rearrangement(Incyte Corporation, 2022)<br>IC <sub>50</sub> for FGFR1, 2, 3, and 4 = 0.4, 0.5, 1.0, and 30.0 nM(Liu et al., 2020) |                       |                                 |                                |
| <b>Phase I</b>                                                                                                                                                                                                                                                                                                                                  |                       |                                 |                                |
| <i>FIGHT-101</i><br>Open-label, phase I/II, dose-escalation study in patients with advanced solid malignancies and progression following prior therapy with no further effective standard therapy available (NCT02393248)(Subbiah et al., 2022)<br>( <i>N</i> = 128)                                                                            | 0/9.4/31.3/38.3       | NR                              | NR                             |
| <i>FIGHT-102</i><br>Open-label, phase I, multisite study in Japanese patients with advanced malignancies (NCT03235570)(Kuboki et al., 2019)<br>( <i>N</i> = 25)                                                                                                                                                                                 | 0/6.3/56.3/37.5       | NR                              | NR                             |
| <b>Phase II</b>                                                                                                                                                                                                                                                                                                                                 |                       |                                 |                                |

|                                                                                                                                                                                                                                                                                                                                                    |                           |                      |                      |
|----------------------------------------------------------------------------------------------------------------------------------------------------------------------------------------------------------------------------------------------------------------------------------------------------------------------------------------------------|---------------------------|----------------------|----------------------|
| <i>FIGHT-202</i><br>Multicenter, open-label, single-arm study in patients with previously treated, locally advanced or metastatic cholangiocarcinoma with or without <i>FGF/FGFR</i> rearrangements (NCT02924376)(Abou-Alfa et al., 2020; Javle et al., 2021a) ( <i>N</i> = 108 with <i>FGFR2</i> rearrangements)                                  | 0/4/36/60                 | 7.0 (6.1-10.5)       | 17.5 (14.4-22.9)     |
| <i>FIGHT-203</i><br>Multicenter study in adult patients with MLN with <i>FGFR1</i> rearrangements (NCT03011372)(Gotlib et al., 2021) ( <i>N</i> = 34)                                                                                                                                                                                              | 77.4/NR/NR/NR             | NR                   | NR                   |
| <b>Phase III</b>                                                                                                                                                                                                                                                                                                                                   |                           |                      |                      |
| <i>FIGHT-302</i><br>Open-label, randomized, active-controlled, multicenter, global study comparing the efficacy and safety of first-line pemigatinib with gemcitabine-cisplatin in patients with advanced CCA with <i>FGFR2</i> rearrangements (NCT03656536)(Bekaii-Saab et al., 2020) ( <i>N</i> = 432 – target enrollment)                       | <i>Trial ongoing</i>      | <i>Trial ongoing</i> | <i>Trial ongoing</i> |
| <b>Futibatinib</b> , approved in the United States for previously treated, unresectable locally advanced or metastatic iCCA with <i>FGFR2</i> gene fusions or other rearrangements(Taiho Oncology, 2022)<br>IC <sub>50</sub> for FGFR1, 2, 3, and 4 = 1.8, 1.4, 1.6, and 3.7.nM(Sootome et al., 2020)                                              |                           |                      |                      |
| <b>Phase I/II</b>                                                                                                                                                                                                                                                                                                                                  |                           |                      |                      |
| <i>FOENIX-CCA2</i><br>First-in-human, phase I/II, dose-escalation and expansion study in patients with advanced solid tumors harboring <i>FGF/FGFR</i> aberrations (NCT02052778)(Goyal et al., 2023; Meric-Bernstam et al., 2021) ( <i>N</i> = 201; 83 with CCA)                                                                                   | Overall: 0/13.7/37.6/48.7 | NR                   | NR                   |
| <b>Phase III</b>                                                                                                                                                                                                                                                                                                                                   |                           |                      |                      |
| <i>FOENIX-CCA3</i><br>Phase III, randomized, open-label, multicenter study comparing futibatinib with gemcitabine plus cisplatin as first-line therapy in patients with advanced, metastatic or unresectable intrahepatic cholangiocarcinoma harboring <i>FGFR2</i> rearrangements (NCT04093362)(Borad et al., 2020) ( <i>N</i> = 216 – estimated) | <i>Trial ongoing</i>      | <i>Trial ongoing</i> | <i>Trial ongoing</i> |
| <b>Derazantinib</b> , not yet approved<br>IC <sub>50</sub> for FGFR1, 2, 3, and 4 = 4.5, 1.8, 4.5, 34 nM(Hall et al., 2016)                                                                                                                                                                                                                        |                           |                      |                      |
| <b>Phase I</b>                                                                                                                                                                                                                                                                                                                                     |                           |                      |                      |
| <i>ARQ 087-101</i><br>Multicenter, phase I/II, open-label study of derazantinib in patients with advanced solid tumors with <i>FGFR</i> genetic alterations, including iCCA with <i>FGFR2</i> fusion (NCT01752920)(Mazzaferro et al., 2019)                                                                                                        | 0/20.7/62.1/17.2          | 5.7 (4.0-9.2)        | NR                   |

|                                                                                                                                                                                                                                                                                                                             |             |                                                                          |                  |
|-----------------------------------------------------------------------------------------------------------------------------------------------------------------------------------------------------------------------------------------------------------------------------------------------------------------------------|-------------|--------------------------------------------------------------------------|------------------|
| <i>(N = 29 [patients with iCCA and FGFR2 gene fusion only])</i>                                                                                                                                                                                                                                                             |             |                                                                          |                  |
| <i>FIDES-02</i><br>Multicohort, open-label, phase Ib/II study of derazantinib plus atezolizumab in patients with advanced solid tumors (NCT04045613)(Abdul-Karim et al., 2021)<br><i>(N = 26; n = 10 evaluable for response)</i>                                                                                            | 0/0/40/60   | NR                                                                       | NR               |
| <b>Phase II</b>                                                                                                                                                                                                                                                                                                             |             |                                                                          |                  |
| <i>FIDES-01</i><br>Pivotal, open-label, single-arm phase II study of derazantinib in previously treated patients with inoperable or advanced iCCA and <i>FGFR2</i> gene fusions, mutations, or amplifications (NCT03230318)(ClinicalTrials.gov, 2021; Droz Dit Busset et al., 2021; Javle et al., 2020)<br><i>(N = 103)</i> | 0/21/54/25  | 7.8 (5.5-8.2)                                                            | 15.5 (11.8-21.9) |
| <b>Rogaratinib</b> , not yet approved<br>IC <sub>50</sub> for FGFR1, 2, 3, and 4 = 1.8, <1, 9.2, 1.2 nM(Grunewald et al., 2019)                                                                                                                                                                                             |             |                                                                          |                  |
| <b>Phase I</b>                                                                                                                                                                                                                                                                                                              |             |                                                                          |                  |
| <i>16443</i><br>Phase I, dose-escalation and expansion study of rogaratinib in patients with advanced solid tumors (NCT01976741)(Schuler et al., 2019)<br><i>(n = 126; n = 100 evaluable for response)</i>                                                                                                                  | 1/14/56/29  | 3.1 (2.0-3.4)                                                            | NR               |
| <i>FORT-2</i><br>Phase Ib/2 study of rogaratinib plus atezolizumab in patients with first-line cisplatin-ineligible advanced/metastatic urothelial carcinoma with <i>FGFR1/3</i> overexpression (NCT03473756)(Rosenberg et al., 2021)<br><i>(N = 26)</i>                                                                    | 13/42/29/17 | NR                                                                       | NR               |
| <b>Phase II/III</b>                                                                                                                                                                                                                                                                                                         |             |                                                                          |                  |
| <i>FORT-1</i><br>Phase II/III, randomized, open-label study comparing rogaratinib with chemotherapy in patients with advanced or metastatic urothelial carcinoma with <i>FGFR1/3</i> overexpression (NCT03410693)(Quinn et al., 2020)<br><i>(N = 87 treated with rogaratinib, 88 treated with chemotherapy)</i>             | NR          | 2.7 (1.6-4.2)<br>(rogaratinib) versus<br>2.9 (2.6-4.2)<br>(chemotherapy) | NR               |

CCA, cholangiocarcinoma; CI, confidence interval; CR, complete response; FDA, US Food and Drug Administration; IC<sub>50</sub>, half maximal concentration; iCCA, intrahepatic cholangiocarcinoma; MLN, myeloid/lymphoid neoplasm; NR, not reported; OS, overall survival; PD, progressive disease; PFS, progression-free survival; PR, partial response; SD, stable disease.

**Supplementary Table 2. High- and low-phosphate foods**

| <b>High-phosphate food</b>                                                                                           | <b>Low-phosphate food</b>                                                                                  |
|----------------------------------------------------------------------------------------------------------------------|------------------------------------------------------------------------------------------------------------|
| Milk, pudding, yogurt (from animals and from many soy varieties)                                                     | Rice milk (unfortified), nondairy creamer (if no ingredients with the letters “phos” in their name)        |
| Hard cheese, ricotta, cottage cheese, fat-free cream cheese                                                          | Regular and low-fat cream cheese                                                                           |
| Ice cream or frozen yogurt                                                                                           | Sherbet or frozen fruit pops                                                                               |
| Soups made with higher-phosphate ingredients (milk, dried peas, beans, lentils)                                      | Soups made with lower phosphate ingredients (broth- or water-based with other lower phosphate ingredients) |
| Whole grains, including whole grain breads, crackers, cereal, rice, and pasta                                        | Refined grains including white bread, crackers, cereals, rice, and pasta                                   |
| Quick breads, biscuits, cornbread, muffins, pancakes, or waffles                                                     | Homemade refined (white) dinner rolls, bagels, or English muffins                                          |
| Dried peas (split, black-eyed), beans (black, garbanzo, lima, kidney, navy, pinto), or lentils                       | Green peas (canned, frozen), green beans, or wax beans                                                     |
| Organ meats, walleye, pollock, or sardines                                                                           | Lean beef, pork, lamb, poultry, or other fish                                                              |
| Nuts and seeds                                                                                                       | Popcorn                                                                                                    |
| Peanut butter and other nut butters                                                                                  | Jam, jelly, or honey                                                                                       |
| Chocolate including chocolate drinks                                                                                 | Carob candy, hard candy, or gumdrops                                                                       |
| Colas and pepper-type sodas, flavored waters, bottled teas (with ingredients whose names contain the letters “phos”) | Lemon-lime soda, ginger ale or root beer, plain water                                                      |

**Supplementary Figure 1. Representative images of adverse events commonly found with fibroblast growth factor receptor inhibitors. (A) Hand nail changes; (B) foot nail changes; (C) axillary calcification; (D) leg calcification.**

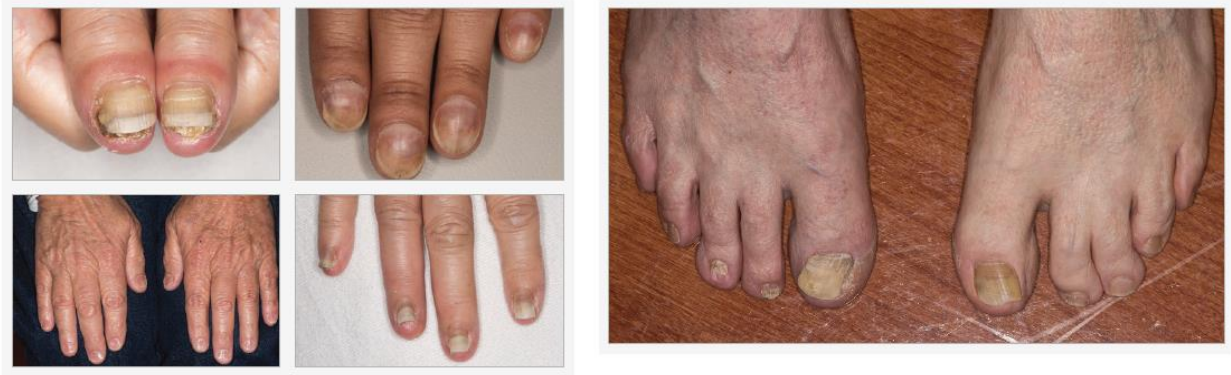

**C**

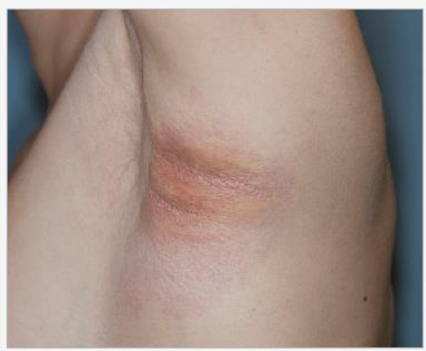

**D**

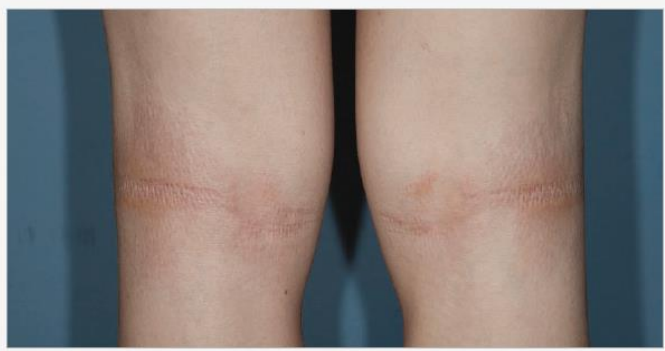

**Supplementary Figure 2. Interpretive diagram of 40 eyes of 20 patients showing the location, size, and configuration of each fluid focus: blue = dome, yellow = splitting. Number represents patient number and circle designates patient had visual symptoms. Reproduced with permission from Francis et al. 2021.(Francis et al., 2021)**

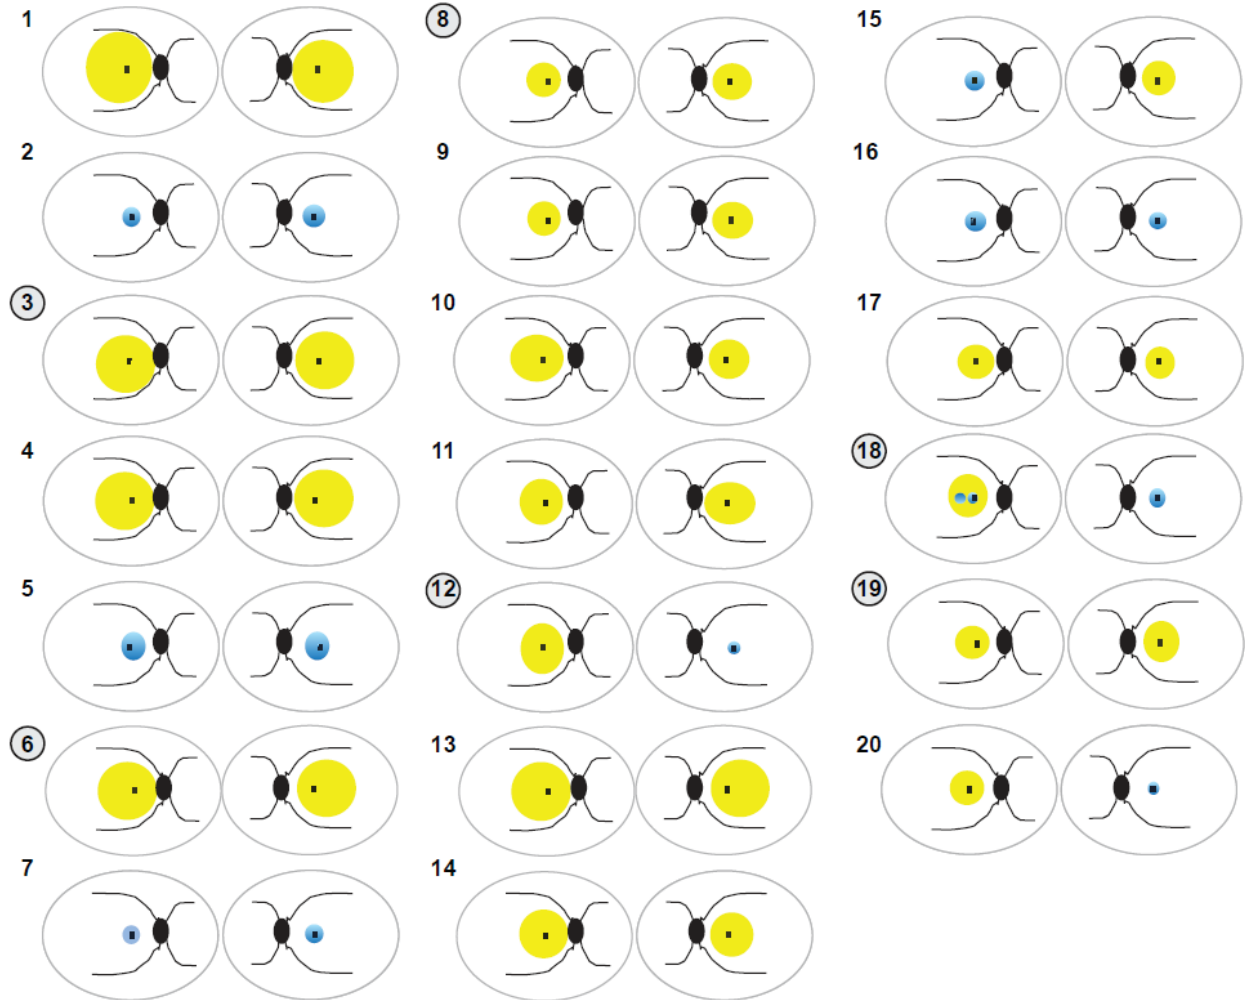

Supplement: mmc1.pdf [file mmc1.pdf]
